# Supplementary material for: Digital DNA detection based on a compact optofluidic laser with ultra-low sample consumption
Source: Royal Society of Chemistry journal article supplement (doi:10.1039/c6lc01258b), 2016-01-01
Supplement: c6lc01258b1.pdf [file c6lc01258b1.pdf]

## Supplementary Information

### **Digital DNA detection based on compact optofluidic laser with ultra-low sample consumption**

Wonsuk Lee,<sup>a</sup> Qiushu Chen,<sup>b</sup> Xudong Fan,<sup>b</sup> and Dong Ki Yoon<sup>a\*</sup>

<sup>a</sup>Graduate School of Nanoscience and Technology and KINC, KAIST, Daejeon, 305-701,  
Republic of Korea.

<sup>b</sup>Department of Biomedical Engineering, University of Michigan, 1101 Beal Ave., Ann  
Arbor, MI 48109, USA.

[\\*nandk@kaist.ac.kr](mailto:*nandk@kaist.ac.kr)

**Table S1.** Sequences of 40 bases long ssDNA samples used in the experiments.

|                              |                                                                             |
|------------------------------|-----------------------------------------------------------------------------|
| Biotinylated probe ssDNA     | 5' – Biotin – ACA ACA AAG AAC AAA TAT<br>ACA TAT ATG ATA TAA CAA CAA A – 3' |
| Target ssDNA                 | 5' – TTT GTT GTT ATA TCA TAT ATG TAT<br>ATT TGT TCT TTG TTG T – 3'          |
| Single-base-mismatched ssDNA | 5' – TTT GTT GTT ATA TCA TAT ATT TAT<br>ATT TGT TCT TTG TTG T – 3'          |

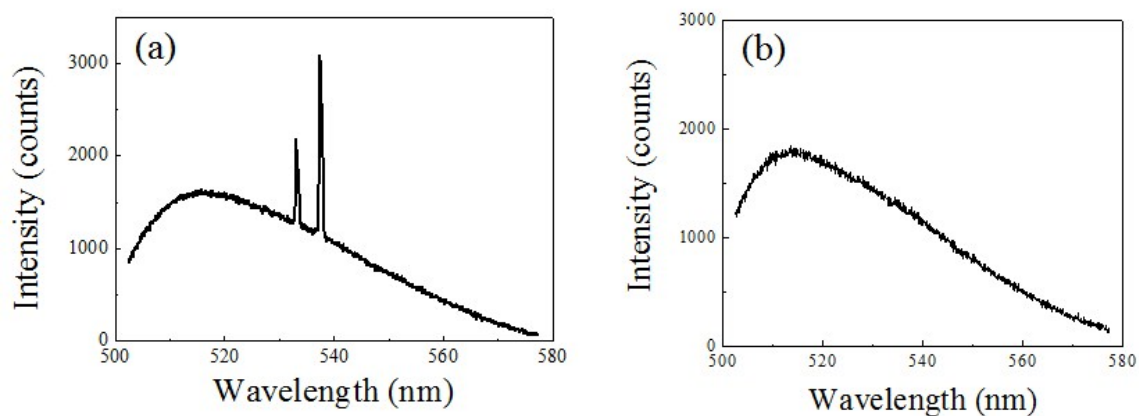

**Figure S1.** Laser emission spectra from a hollow-core glass capillary OFRR with the dsDNA-intercalating dye solution (250  $\mu\text{M}$ ) filling out the entire cavity. Temperature is 55°C and pump intensity is 500  $\mu\text{J}/\text{mm}^2$  for both. (a) Laser emission from the target is superimposed to the fluorescence background. (b) The single-base-mismatched DNA does not show laser emission, while the fluorescence background persists.
